# Supplementary material for: In situ tracking of defect healing and purification of single-wall carbon nanotubes with laser radiation by time-resolved Raman spectroscopy
Source: Royal Society of Chemistry journal article supplement (doi:10.1039/c5ra09316c), 2015-01-01
Supplement: c5ra09316c1.pdf [file c5ra09316c1.pdf]

## Supporting Information

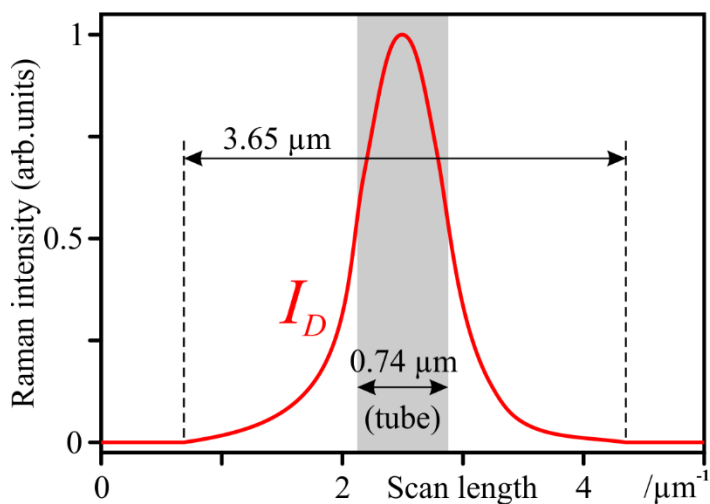

Figure S1 - Beam spot diameter determination: A Raman scan of an amorphous carbon fiber from <sup>1</sup> with 0.175 mW. The known tube diameter (0.74  $\mu\text{m}$ ) was subtracted from the length of the monitored increment and decay in  $I_G$ . The resulting beam spot diameter is 2.91  $\mu\text{m}$ .

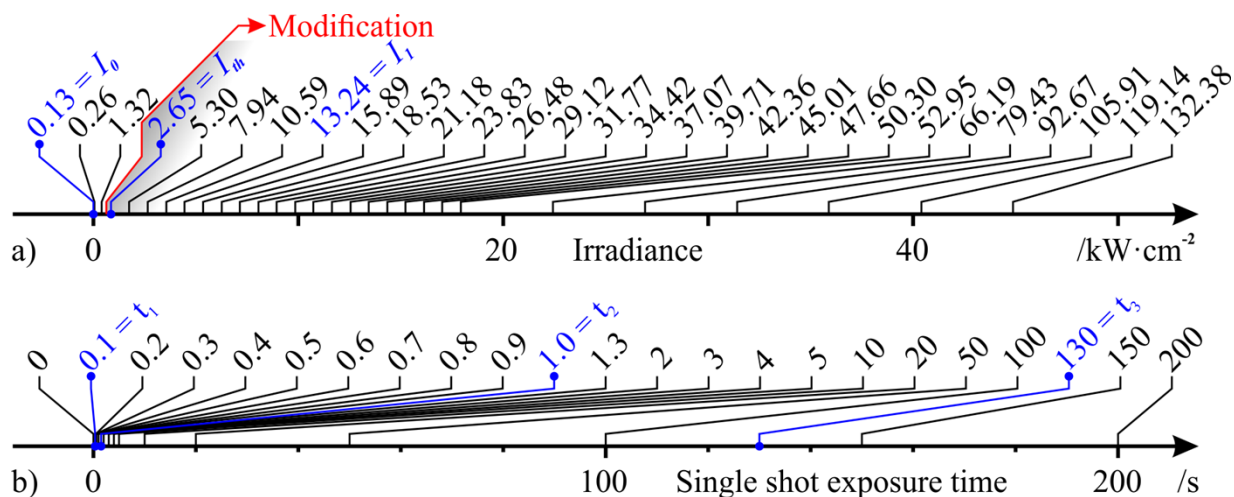

Figure S2 - Laser irradiance (a) and exposure time sweeps (b) – Different intervals adapt to the rate of change of the Raman signal. Values  $I_0$ ,  $I_{thr}$ ,  $I_1$  and  $t_{1-3}$  are reference values for observed singularities.
